# Supplementary material for: AFM and NMR imaging of squid tropomyosin Tod p1 subjected to high hydrostatic pressure: evidence for relationships among topography, characteristic domain and allergenicity
Source: Royal Society of Chemistry journal article supplement (doi:10.1039/c5ra13655e), 2015-01-01
Supplement: c5ra13655e1.pdf [file c5ra13655e1.pdf]

**Supplementary Table S1.** Correlation analysis of subsection integral in <sup>1</sup>H NMR spectra with allergenic properties and AFM surface topography indexes in control and different HHP treated squid TMTp1.

| Range number: ppm | Pressure <sup>#</sup> | Cycle   | Allergenic properties |                |                |                |                |             |         |          | AFM surface topography indexes |                  |         |         |
|-------------------|-----------------------|---------|-----------------------|----------------|----------------|----------------|----------------|-------------|---------|----------|--------------------------------|------------------|---------|---------|
|                   |                       |         | IgE binding           |                |                |                |                | IgG binding |         |          | R <sub>a</sub>                 | R <sub>max</sub> | S       | K       |
|                   |                       |         | P <sup>1</sup>        | P <sup>2</sup> | P <sup>3</sup> | P <sup>4</sup> | P <sup>5</sup> | R           | R-SGF   | R-SIF    |                                |                  |         |         |
| 1: 0.71-0.75      | -0.41                 | -0.47*  | 0.43                  | 0.58**         | 0.51*          | 0.57**         | 0.65**         | 0.60**      | 0.56**  | 0.73***  | -0.05                          | -0.25            | -0.03   | 0.04    |
| 2: 0.75-0.80      | 0.24                  | 0.34    | -0.27                 | -0.41          | -0.34          | -0.43          | -0.47*         | -0.43       | -0.39   | -0.57**  | -0.06                          | 0.21             | 0.05    | 0.00    |
| 3: 0.80-0.84      | 0.10                  | 0.21    | -0.12                 | -0.25          | -0.18          | -0.28          | -0.31          | -0.27       | -0.24   | -0.44*   | -0.17                          | 0.13             | 0.10    | 0.07    |
| 4: 0.84-0.89      | 0.17                  | 0.30    | -0.21                 | -0.33          | -0.28          | -0.36          | -0.40          | -0.37       | -0.32   | -0.53*   | -0.11                          | 0.16             | 0.07    | 0.02    |
| 5: 0.89-0.94      | -0.22                 | -0.31   | 0.24                  | 0.36           | 0.28           | 0.39           | 0.42           | 0.38        | 0.35    | 0.57**   | 0.06                           | -0.23            | -0.04   | 0.00    |
| 6: 0.94-0.99      | -0.38                 | -0.48*  | 0.44                  | 0.56**         | 0.48*          | 0.58**         | 0.62**         | 0.58**      | 0.55**  | 0.70***  | -0.10                          | -0.35            | 0.06    | 0.12    |
| 7: 0.99-1.03      | -0.45*                | -0.56** | 0.53*                 | 0.65**         | 0.56**         | 0.66**         | 0.69***        | 0.65**      | 0.63**  | 0.74***  | -0.19                          | -0.44            | 0.13    | 0.19    |
| 8: 1.04-1.08      | -0.40                 | -0.60** | 0.64**                | 0.46*          | 0.53**         | 0.53**         | 0.41           | 0.47**      | 0.49**  | 0.28     | -0.77***                       | -0.76***         | 0.73*** | 0.73*** |
| 9: 1.09-1.13      | -0.16                 | -0.45*  | 0.37                  | 0.30           | 0.25           | 0.40           | 0.30           | 0.30        | 0.32    | 0.43     | -0.36                          | -0.66**          | 0.46*   | 0.46*   |
| 10: 1.14-1.19     | -0.32                 | -0.49*  | 0.41                  | 0.49*          | 0.44*          | 0.54*          | 0.55**         | 0.52*       | 0.48*   | 0.68**   | -0.13                          | -0.41            | 0.14    | 0.19    |
| 11: 1.19-1.24     | 0.41                  | 0.58**  | -0.51*                | -0.65**        | -0.62**        | -0.65**        | -0.72***       | -0.68***    | -0.63** | -0.75*** | 0.17                           | 0.33             | -0.11   | -0.18   |
| 12: 1.24-1.29     | 0.19                  | 0.21    | -0.16                 | -0.34          | -0.25          | -0.34          | -0.41          | -0.36       | -0.32   | -0.49*   | -0.21                          | 0.04             | 0.21    | 0.16    |
| 13: 1.29-1.34     | 0.25                  | 0.29    | -0.24                 | -0.41          | -0.33          | -0.41          | -0.48*         | -0.43       | -0.39   | -0.57**  | -0.13                          | 0.10             | 0.15    | 0.10    |
| 14: 1.34-1.38     | 0.26                  | 0.32    | -0.27                 | -0.43          | -0.33          | -0.44          | -0.48*         | -0.44*      | -0.41   | -0.54**  | -0.08                          | 0.20             | 0.08    | 0.03    |
| 15: 1.39-1.44     | -0.35                 | -0.53** | 0.46*                 | 0.52*          | 0.47*          | 0.57**         | 0.58**         | 0.55**      | 0.51*   | 0.73***  | -0.18                          | -0.46*           | 0.18    | 0.23    |
| 16: 1.44-1.49     | -0.35                 | -0.64** | 0.53**                | 0.56**         | 0.55**         | 0.62**         | 0.61**         | 0.60**      | 0.56**  | 0.74***  | -0.31                          | -0.56*           | 0.34    | 0.38    |
| 17: 1.49-1.53     | -0.29                 | -0.61** | 0.58**                | 0.36           | 0.46*          | 0.47*          | 0.34           | 0.40        | 0.40    | 0.32     | -0.74***                       | -0.80***         | 0.78*** | 0.77*** |

Table (Continued)

| Range<br>number: ppm | Pressure | Cycle    | Allergenic properties |                |                |                |                |             |          |          | AFM surface topography indexes |                  |        |        |
|----------------------|----------|----------|-----------------------|----------------|----------------|----------------|----------------|-------------|----------|----------|--------------------------------|------------------|--------|--------|
|                      |          |          | IgE binding           |                |                |                |                | IgG binding |          |          | R <sub>a</sub>                 | R <sub>max</sub> | S      | K      |
|                      |          |          | P <sup>1</sup>        | P <sup>2</sup> | P <sup>3</sup> | P <sup>4</sup> | P <sup>5</sup> | R           | R-SGF    | R-SIF    |                                |                  |        |        |
| 18: 1.54-1.59        | 0.24     | 0.23     | -0.19                 | -0.38          | -0.28          | -0.37          | -0.45*         | -0.39       | -0.36    | -0.53*   | -0.19                          | 0.05             | 0.22   | 0.17   |
| 19: 1.59-1.64        | 0.30     | 0.22     | -0.21                 | -0.43          | -0.32          | -0.39          | -0.49*         | -0.43       | -0.39    | -0.54*   | -0.20                          | -0.02            | 0.29   | 0.22   |
| 20: 1.64-1.69        | -0.22    | -0.59**  | 0.48*                 | 0.37           | 0.42           | 0.48*          | 0.39           | 0.42        | 0.39     | 0.50*    | -0.47*                         | -0.71***         | 0.58** | 0.59** |
| 21: 1.69-1.74        | -0.34    | -0.61**  | 0.52*                 | 0.55**         | 0.53*          | 0.61**         | 0.59**         | 0.58**      | 0.55**   | 0.68***  | -0.30                          | -0.56**          | 0.33   | 0.38   |
| 22: 1.74-1.79        | -0.32    | -0.69*** | 0.58**                | 0.51*          | 0.55**         | 0.61**         | 0.55**         | 0.56**      | 0.53*    | 0.64**   | -0.48*                         | -0.71***         | 0.55** | 0.58** |
| 23: 1.79-1.84        | 0.47*    | 0.61**   | -0.58**               | -0.73***       | -0.64**        | -0.73***       | -0.76***       | -0.73***    | -0.71*** | -0.71*** | 0.25                           | 0.44*            | -0.18  | -0.23  |
| 24: 1.84-1.89        | -0.09    | -0.49*   | 0.35                  | 0.22           | 0.29           | 0.35           | 0.26           | 0.28        | 0.25     | 0.40     | -0.37                          | -0.61**          | 0.54** | 0.53*  |
| 25: 1.90-1.94        | 0.23     | 0.16     | -0.13                 | -0.34          | -0.24          | -0.30          | -0.41          | -0.35       | -0.31    | -0.49*   | -0.26                          | -0.07            | 0.32   | 0.26   |
| 26: 1.94-1.97        | 0.27     | 0.29     | -0.25                 | -0.42          | -0.33          | -0.41          | -0.48*         | -0.43       | -0.39    | -0.58**  | -0.13                          | 0.11             | 0.16   | 0.11   |
| 27: 1.97-2.02        | 0.28     | 0.30     | -0.25                 | -0.42          | -0.35          | -0.42          | -0.49*         | -0.44*      | -0.40    | -0.60**  | -0.12                          | 0.10             | 0.16   | 0.10   |
| 28: 2.02-2.06        | -0.15    | -0.46*   | 0.36                  | 0.33           | 0.32           | 0.42           | 0.35           | 0.36        | 0.35     | 0.43     | -0.29                          | -0.57**          | 0.41   | 0.41   |
| 29: 2.06-2.12        | -0.27    | -0.48*   | 0.39                  | 0.47*          | 0.42           | 0.51*          | 0.52*          | 0.49*       | 0.46*    | 0.62**   | -0.13                          | -0.41            | 0.17   | 0.21   |
| 30: 2.12-2.16        | 0.23     | 0.25     | -0.19                 | -0.36          | -0.29          | -0.36          | -0.43          | -0.38       | -0.34    | -0.55**  | -0.17                          | 0.06             | 0.19   | 0.13   |
| 31: 2.17-2.22        | 0.15     | -0.21    | 0.10                  | -0.04          | 0.01           | 0.06           | -0.06          | -0.03       | -0.01    | -0.03    | -0.30                          | -0.45*           | 0.51*  | 0.46*  |
| 32: 2.22-2.27        | -0.25    | -0.46*   | 0.37                  | 0.43           | 0.39           | 0.49*          | 0.48*          | 0.46*       | 0.43     | 0.59**   | -0.14                          | -0.43            | 0.19   | 0.23   |
| 33: 2.27-2.32        | -0.27    | -0.43    | 0.35                  | 0.45*          | 0.38           | 0.49*          | 0.50*          | 0.47*       | 0.44*    | 0.61***  | -0.07                          | -0.36            | 0.10   | 0.14   |
| 34: 2.32-2.36        | -0.27    | -0.43    | 0.35                  | 0.45*          | 0.39           | 0.49*          | 0.51*          | 0.48*       | 0.44*    | 0.61**   | -0.05                          | -0.33            | 0.08   | 0.12   |

Table (Continued)

| Range<br>number: ppm | Pressure | Cycle  | Allergenic properties |                |                |                |                |             |        |          | AFM surface topography indexes |                  |         |         |
|----------------------|----------|--------|-----------------------|----------------|----------------|----------------|----------------|-------------|--------|----------|--------------------------------|------------------|---------|---------|
|                      |          |        | IgE binding           |                |                |                |                | IgG binding |        |          | R <sub>a</sub>                 | R <sub>max</sub> | S       | K       |
|                      |          |        | P <sup>1</sup>        | P <sup>2</sup> | P <sup>3</sup> | P <sup>4</sup> | P <sup>5</sup> | R           | R-SGF  | R-SIF    |                                |                  |         |         |
| 35: 2.36-2.40        | -0.34    | -0.45* | 0.39                  | 0.52*          | 0.44*          | 0.54*          | 0.58**         | 0.54*       | 0.51*  | 0.67***  | -0.06                          | -0.32            | 0.04    | 0.09    |
| 36: 2.40-2.45        | -0.30    | -0.43  | 0.36                  | 0.49*          | 0.41           | 0.51*          | 0.54*          | 0.50*       | 0.47*  | 0.63**   | -0.05                          | -0.32            | 0.05    | 0.10    |
| 37: 2.45-2.50        | -0.23    | -0.38  | 0.29                  | 0.40           | 0.34           | 0.44*          | 0.46*          | 0.43        | 0.39   | 0.58**   | 0.00                           | -0.29            | 0.03    | 0.07    |
| 38: 2.50-2.55        | -0.23    | -0.41  | 0.32                  | 0.41           | 0.36           | 0.45*          | 0.47*          | 0.44*       | 0.40   | 0.59**   | -0.04                          | -0.32            | 0.09    | 0.13    |
| 39: 2.55-2.60        | -0.22    | -0.38  | 0.29                  | 0.40           | 0.35           | 0.44*          | 0.46*          | 0.43        | 0.39   | 0.57**   | 0.00                           | -0.29            | 0.05    | 0.09    |
| 40: 2.60-2.65        | 0.28     | 0.32   | -0.27                 | -0.43          | -0.34          | -0.43          | -0.50*         | -0.45*      | -0.41  | -0.61**  | -0.10                          | 0.14             | 0.13    | 0.08    |
| 41: 2.65-2.70        | -0.16    | -0.31  | 0.22                  | 0.34           | 0.27           | 0.37           | 0.39           | 0.36        | 0.32   | 0.52*    | 0.06                           | -0.23            | 0.00    | 0.04    |
| 42: 2.70-2.75        | -0.33    | -0.43  | 0.38                  | 0.52*          | 0.42           | 0.53**         | 0.56**         | 0.52*       | 0.50*  | 0.63**   | -0.05                          | -0.33            | 0.04    | 0.09    |
| 43: 2.75-2.80        | -0.22    | -0.34  | 0.26                  | 0.39           | 0.32           | 0.41           | 0.45*          | 0.41        | 0.37   | 0.57**   | 0.06                           | -0.22            | -0.03   | 0.02    |
| 44: 2.80-2.85        | 0.17     | 0.24   | -0.17                 | -0.32          | -0.23          | -0.33          | -0.37          | -0.33       | -0.30  | -0.50**  | -0.14                          | 0.15             | 0.10    | 0.07    |
| 45: 2.85-2.90        | 0.46*    | 0.44*  | -0.44*                | -0.60**        | -0.48*         | -0.59**        | -0.64**        | -0.60**     | -0.58* | -0.70*** | 0.06                           | 0.31             | 0.04    | -0.03   |
| 46: 2.90-2.95        | 0.02     | -0.07  | -0.03                 | 0.11           | 0.04           | 0.13           | 0.18           | 0.13        | 0.09   | 0.34     | 0.30                           | 0.02             | -0.21   | -0.18   |
| 47: 2.95-3.00        | -0.35    | -0.48* | 0.43                  | 0.55**         | 0.46*          | 0.57**         | 0.59**         | 0.56**      | 0.54*  | 0.64**   | -0.11                          | -0.38            | 0.10    | 0.15    |
| 48: 3.00-3.05        | -0.33    | -0.44* | 0.39                  | 0.53*          | 0.44*          | 0.54**         | 0.57**         | 0.54*       | 0.51*  | 0.62**   | -0.07                          | -0.33            | 0.06    | 0.10    |
| 49: 3.05-3.10        | -0.14    | -0.16  | 0.10                  | 0.28           | 0.18           | 0.28           | 0.34           | 0.29        | 0.26   | 0.44*    | 0.23                           | -0.03            | -0.21   | -0.18   |
| 50: 3.10-3.15        | 0.21     | 0.27   | -0.34                 | -0.17          | -0.26          | -0.18          | -0.11          | -0.16       | -0.20  | 0.05     | 0.60**                         | 0.34             | -0.49*  | -0.48*  |
| 51: 3.15-3.20        | 0.37     | 0.47*  | -0.54*                | -0.39          | -0.47*         | -0.40          | -0.33          | -0.38       | -0.41  | -0.15    | 0.72***                        | 0.50*            | -0.58** | -0.59** |

Table (Continued)

| Range number: ppm | Pressure | Cycle   | Allergenic properties |                |                |                |                |             |          |          |         | AFM surface topography indexes |                  |          |   |
|-------------------|----------|---------|-----------------------|----------------|----------------|----------------|----------------|-------------|----------|----------|---------|--------------------------------|------------------|----------|---|
|                   |          |         | IgE binding           |                |                |                |                | IgG binding |          |          |         | R <sub>a</sub>                 | R <sub>max</sub> | S        | K |
|                   |          |         | P <sup>1</sup>        | P <sup>2</sup> | P <sup>3</sup> | P <sup>4</sup> | P <sup>5</sup> | R           | R-SGF    | R-SIF    |         |                                |                  |          |   |
| 52: 3.20-3.24     | -0.02    | 0.05    | -0.10                 | 0.11           | 0.01           | 0.08           | 0.18           | 0.12        | 0.08     | 0.29     | 0.45*   | 0.22                           | -0.43            | -0.39    |   |
| 53: 3.24-3.27     | 0.22     | 0.65**  | -0.55**               | -0.42          | -0.49*         | -0.52*         | -0.42          | -0.45*      | -0.45*   | -0.42    | 0.62**  | 0.74***                        | -0.71***         | -0.71*** |   |
| 54: 3.27-3.31     | 0.11     | 0.23    | -0.28                 | -0.06          | -0.16          | -0.10          | 0.01           | -0.05       | -0.09    | 0.13     | 0.59**  | 0.41                           | -0.56**          | -0.53*   |   |
| 55: 3.32-3.36     | 0.41     | 0.69*** | -0.70***              | -0.52*         | -0.57**        | -0.59**        | -0.47*         | -0.52*      | -0.55**  | -0.39    | 0.84*** | 0.84***                        | -0.79***         | -0.80*** |   |
| 56: 3.36-3.39     | 0.45*    | 0.75*** | -0.74***              | -0.58**        | -0.62**        | -0.66**        | -0.54*         | -0.59**     | -0.61**  | -0.49*   | 0.83*** | 0.89***                        | -0.80***         | -0.81*** |   |
| 57: 3.40-3.43     | 0.46*    | 0.78*** | -0.73***              | -0.66**        | -0.66**        | -0.75***       | -0.67***       | -0.68***    | -0.68*** | -0.69*** | 0.65**  | 0.84***                        | -0.64**          | -0.67*** |   |
| 58: 3.43-3.47     | 0.32     | 0.56**  | -0.48*                | -0.51*         | -0.47*         | -0.57**        | -0.55**        | -0.54**     | -0.51**  | -0.67*** | 0.26    | 0.55**                         | -0.30            | -0.34    |   |
| 59: 3.47-3.51     | 0.01     | 0.18    | -0.08                 | -0.15          | -0.07          | -0.20          | -0.19          | -0.16       | -0.14    | -0.35    | -0.11   | 0.22                           | -0.02            | -0.03    |   |

#Pressure: 0.1, 200, 400 or 600 MPa of control or HHP treated pressure. Cycle: single- or two-cycle high hydrostatic pressure. P<sup>1</sup>–P<sup>5</sup>: indirect ELISA with human sera of five allergic patients. R: indirect ELISA with rabbit anti-squid TMTp1 polyclonal antibodies. R-SGF: indirect ELISA with rabbit anti-squid TMTp1 polyclonal antibodies for hydrolysates after Simulated Gastric Fluid digestion (SGF) digestion. R-SIF: indirect ELISA with rabbit anti-squid TMTp1 polyclonal antibodies for hydrolysates after Simulated Intestinal Fluid (SIF) digestion. R<sub>a</sub>: mean roughness, R<sub>max</sub>: max height, S: skewness, K: kurtosis.

Significant at \*( $p < 0.05$ ); \*\*( $p < 0.01$ ); \*\*\*( $p < 0.001$ ).

**Supplementary Table S2.** Correlation analysis of allergenic properties with AFM surface topography indexes in control and different HHP treated squid TMTp1.

| Pressure <sup>#</sup> | Mode | Allergenic properties |                |                |                |                |             |          |          |          | AFM surface topography indexes |                  |          |       |
|-----------------------|------|-----------------------|----------------|----------------|----------------|----------------|-------------|----------|----------|----------|--------------------------------|------------------|----------|-------|
|                       |      | IgE binding           |                |                |                |                | IgG binding |          |          |          | R <sub>a</sub>                 | R <sub>max</sub> | S        | K     |
|                       |      | P <sup>1</sup>        | P <sup>2</sup> | P <sup>3</sup> | P <sup>4</sup> | P <sup>5</sup> | R           | R-SGF    | R-SIF    |          |                                |                  |          |       |
| Pressure              | 1.00 | -                     | -0.79***       | -0.81***       | -0.75***       | -0.77***       | -0.79***    | -0.79*** | -0.79*** | -0.58**  | 0.41                           | 0.53*            | -0.06    | -0.15 |
| Mode                  | 1.00 | -0.90***              | -0.84***       | -0.86***       | -0.90***       | -0.85***       | -0.87***    | -0.86*** | -0.89*** | 0.90***  | 0.88***                        | -0.80***         | -0.85*** |       |
| P <sup>1</sup>        |      | 1.00                  | 0.93***        | 0.93***        | 0.96***        | 0.92***        | 0.92***     | 0.94***  | 0.81***  | -0.82*** | -0.85***                       | 0.60**           | 0.67***  |       |
| P <sup>2</sup>        |      |                       | 1.00           | 0.93***        | 0.97***        | 0.98***        | 0.97***     | 0.98***  | 0.84***  | -0.66**  | -0.68***                       | 0.41             | 0.49*    |       |
| P <sup>3</sup>        |      |                       |                | 1.00           | 0.94***        | 0.93***        | 0.94***     | 0.94***  | 0.79***  | -0.70*** | -0.69***                       | 0.48*            | 0.56**   |       |
| P <sup>4</sup>        |      |                       |                |                | 1.00           | 0.97***        | 0.97***     | 0.99***  | 0.86***  | -0.74*** | -0.78***                       | 0.52*            | 0.60**   |       |
| P <sup>5</sup>        |      |                       |                |                |                | 1.00           | 0.98***     | 0.98***  | 0.88***  | -0.64**  | -0.67***                       | 0.40             | 0.48*    |       |
| R                     |      |                       |                |                |                |                | 1.00        | 0.98***  | 0.87***  | -0.68*** | -0.70***                       | 0.44*            | 0.52*    |       |
| R-SGF                 |      |                       |                |                |                |                |             | 1.00     | 0.83***  | -0.70*** | -0.71***                       | 0.45*            | 0.53*    |       |
| R-SIF                 |      |                       |                |                |                |                |             |          | 1.00     | -0.67*** | -0.73***                       | 0.53*            | 0.61**   |       |
| R <sub>a</sub>        |      |                       |                |                |                |                |             |          |          | 1.00     | 0.91***                        | -0.92***         | -0.95*** |       |
| R <sub>max</sub>      |      |                       |                |                |                |                |             |          |          |          | 1.00                           | -0.84***         | -0.87*** |       |
| S                     |      |                       |                |                |                |                |             |          |          |          |                                | 1.00             | 0.99***  |       |
| K                     |      |                       |                |                |                |                |             |          |          |          |                                |                  | 1.00     |       |

<sup>#</sup>Pressure: 0.1, 200, 400 or 600 MPa of control or HHP treated pressure. Cycle: single- or two-cycle high hydrostatic pressure. P<sup>1</sup>–P<sup>5</sup>: indirect

ELISA with human sera of five allergic patients. R: indirect ELISA with rabbit anti-squid TMTp1 polyclonal antibodies. R-SGF: indirect ELISA with rabbit anti-squid TMTp1 polyclonal antibodies for hydrolysates after Simulated Gastric Fluid digestion (SGF) digestion. R-SIF: indirect ELISA with rabbit anti-squid TMTp1 polyclonal antibodies for hydrolysates after Simulated Intestinal Fluid (SIF) digestion.  $R_a$ : mean roughness,  $R_{max}$ : max height, S: skewness, K: kurtosis.

Significant at  $*(p < 0.05)$ ;  $** (p < 0.01)$ ;  $*** (p < 0.001)$ .
